1 **Policy driven changes in animal research practices: mapping researchers' attitudes**  
2 **towards animal-free innovations using the Netherlands as an example**

3

4 **Short Title: Researchers' attitudes towards animal-free innovations**

5 S. Bressers <sup>1¶</sup>, H. van den Elzen <sup>1¶</sup>, C. Gräwe <sup>1¶</sup>, D. van den Oetelaar <sup>1¶</sup>, P.H.A. Postma <sup>1¶</sup>,  
6 S.K. Schoustra <sup>1¶\*</sup>

7

8 <sup>1</sup> Radboud Honours Academy, Radboud University, Nijmegen, the Netherlands

9

10 \* Corresponding author

11 Email: [rha.animalresearch@gmail.com](mailto:rha.animalresearch@gmail.com) (SS)

12

13

14 <sup>¶</sup>These authors contributed equally to this work.

15

## 16 **Abstract**

17 Reducing the number of animals used in experiments has become a priority for the  
18 governments of many countries. For these reductions to occur, animal-free alternatives must  
19 be made more available and, crucially, must be embraced by researchers. We conducted an  
20 international online survey for academics in the field of animal science (N=367) to explore  
21 researchers' attitudes towards the implementation of animal-free innovations.  
22 Through this survey we address three key questions. The first question is whether scientists  
23 who use animals in their research consider governmental goals for animal-free innovations  
24 achievable and whether they would support such goals. Secondly, responders were asked to  
25 rank the importance of ten roadblocks that could hamper the implementation of animal-free  
26 innovations. Finally, responders were asked whether they would migrate (either themselves  
27 or their research) if increased animal research regulations in their country of residence  
28 restricted their research. While nearly half (40%) of the responders support governmental  
29 goals, the majority (71%) of researchers did not consider such goals achievable in their field  
30 within the near future. In terms of roadblocks for implementation of animal-free methods,  
31 ~80% of the responders considered 'reliability' as important, making it the most highly ranked  
32 roadblock. However, all other roadblocks were reported by the majority of responders as  
33 somewhat important, suggesting that they must also be considered when addressing animal-  
34 free innovations. Importantly, a majority reported that they would consider migration to  
35 another country in response to restrictive animal research policy. Thus, governments must  
36 consider the risk of researchers migrating to other institutes, states or countries, leading to a  
37 'brain-drain' if policies are too strict or suitable animal-free alternatives are not available. Our  
38 findings suggest that development and implementation of animal-free innovations are  
39 hampered by multiple factors. We outline three pillars concerning education, governmental  
40 influence and data sharing, the implementation of which may help to overcome these  
41 roadblocks to animal-free innovations.

## 42 **Introduction**

43 Animal research has played a critical role in many scientific and medical achievements of the  
44 past century. Animal models are used across many fields, including fundamental, biomedical,  
45 behavioural, military and agricultural research [1]. Around the world, quality of life has been  
46 greatly improved by the research, medicines, treatments and safer environments that have  
47 been developed as a consequence of animal-based research in these fields. However, the  
48 ethical issues associated with using animals and increased concern regarding animal  
49 wellbeing [2], together with concerns regarding the translatability of animal models [3] and  
50 practical difficulties of using animals [4], are gaining importance. In line with this, the  
51 principles of 3R (Replacement, Reduction and Refinement) described by Russell and Burch  
52 [5] have been embedded in national and international legislation and regulations on the use  
53 of animals [6, 7]. An example of such international legislation is the EU directive 2010/63/EU,  
54 which concerns European wide implementation of the 3R policy [8]. However, the exact  
55 success rates of these 3R-related policies towards animal-free innovations is difficult to  
56 measure. Evidence from the field suggests that the transition towards animal-free research is  
57 moving slowly. For example, funding for studies that use alternative methods is relatively low  
58 compared to animal studies [9] and journals that focus on animal-based experiments are  
59 generally of higher impact than those that focus on alternative models [10].

60

61 Low update of animal-free innovations is partly due to a lack of insight by policy-makers into  
62 the preferences and needs of researchers. Additionally, researchers tend to use well-known,  
63 widely available methods in their experiments. Furthermore, domestic legislation can easily  
64 be bypassed with collaborations abroad, since the research community is a mobile group  
65 that often works across institutions, states or countries with varying policies regarding animal  
66 research. These and other factors that hamper successful implementation will in this study  
67 be referred to as 'roadblocks'. Given these roadblocks, it is important to investigate the  
68 attitude of scientists towards the implementation of animal-free innovations. This is a  
69 relatively unexplored terrain in the success of 3R policies. As long as the implementation of

70 animal-free innovations remains limited and researchers remain unaware of alternatives,  
71 such methods will not gain traction within scientific disciplines. Therefore, attempts to  
72 improve the implementation have been made.

73

74 A recent example of a governmental policy advocating the implementation of animal-free  
75 innovations is a goal set by the Dutch government, which aims to become the world-leading  
76 country in animal-free innovations by 2025 [11]. This will be addressed as the ‘2025-goal’ in  
77 the remainder of this article. Questions that arise from such a goal include whether  
78 researchers would be supportive, and whether they think this goal would be practical and  
79 achievable. In addition, to promote the communication between governmental instances and  
80 academia, we tried to gain insight into the most important roadblocks of the implementation  
81 of animal-free innovations. In this study, researchers from both the Netherlands and other  
82 countries were asked to comment on these questions. A future consequence of restricted  
83 legislation concerning animal research may be migration of researchers to other areas with  
84 less strict regulations, reducing the country’s competitiveness in research [12]. By  
85 investigating the probability of researchers migrating to other institutes, states or countries  
86 because of stricter legislations, the consequences of such governmental measures can be  
87 estimated.

88

89 Given the global increase in concern for animal welfare, it is likely that other governments will  
90 set similar goals regarding the use of animal-free innovations in research. Mapping the  
91 attitudes of both Dutch and foreign researchers towards the Dutch 2025-goal provided  
92 insights from those who are subject to the goal, as well as outside perspectives. In this  
93 matter, we can map the attitude of the Dutch researchers, but also that of others who might  
94 experience similar goals in their own country. Furthermore, the hypothesis that a proportion  
95 of researchers may move to another location in response to more strict regulations was  
96 addressed. Evidence of stagnation in knowledge-development as a consequence of forced  
97 restricting in legislation will be presented and discussed. Gaining insights into the above will

98 allow for exploration of the success of governmental policies and the attitude of researchers  
99 towards the implementation of animal-free innovations.

100

## 101 **Methods**

102 An international online survey asked participants about the 2025-goal, a list of potential  
103 roadblocks, and their willingness to migrate as result of governmental influences on the  
104 implementation of animal-free innovations. Data management, security, and integrity of the  
105 survey was approved by the Social Sciences Ethics Committee at Radboud University in  
106 Nijmegen, the Netherlands (registration number: ECSW2017-3001-466), and was endorsed  
107 by rector Prof. Han van Krieken, license holder for animal research at Radboud University  
108 and Radboudumc.

109

### 110 Sample selection

111 Scientists at academic centres in the regions of Nijmegen, Rotterdam, Utrecht, Amsterdam,  
112 Maastricht and Groningen, as well as large academic centres located in the United States  
113 and in countries surrounding the Netherlands were invited via email to participate in the  
114 survey. The same process was used for companies in the Netherlands that perform animal-  
115 based research. All potential participants were currently working in or had worked in any field  
116 related to animal experimentation, alternatives or policy. The informed consent, that was sent  
117 along with the survey, included a request for participants to share the survey with others who  
118 might be interested. Therefore, the non-participation rate for this study is unknown. In total,  
119 457 participants responded to the survey, but only responders working in the academic  
120 sector (N=382) were selected for analysis as they form a uniform and comparable group, Fig  
121 1. Additionally, students working in an academic setting (N=17) were excluded because they  
122 are still relatively new in this field. This resulted in a study population of 367 researchers.

123

124 **Fig 1. Selection of study population concluding a group of 367 researchers working in**  
125 **an academic setting.**

126

## 127 Survey procedure and measures

128 The survey was available from March 18 to March 27, 2017. To obtain an overview of the  
129 opinions and thoughts about the 2025-goal, responders were briefly introduced to the 2025-  
130 goal. Hereafter, the following questions were asked: "*What is your opinion about the number*  
131 *of animals currently used in experimentation in the field you are working in?*", "*Should*  
132 *research be animal-free?*", "*Is the 2025-goal achievable?*", and "*Would you support the 2025-*  
133 *goal?*". After this, responders were asked to rate the potential importance of a set of ten  
134 potential roadblocks. These roadblocks were identified from previous studies conducted in  
135 the Netherlands that addressed possible issues regarding the implementation of alternatives  
136 for biomedical sciences [13, 14]. The resulting list was narrowed down to ten roadblocks that  
137 were used to establish a ranking based on the outcome of the survey. After each question,  
138 responders had the opportunity to elaborate on their answers in free text boxes. After this,  
139 demographic information was gathered, including information about educational background,  
140 nationality, and whether the participant was currently working with animals. Based on their  
141 answer to the latter question, responders were directed to specific questions regarding  
142 animal models and alternatives, and were asked for their personal opinion about different  
143 statements, including the question whether researchers would consider moving to another  
144 country due to changes in regulation regarding animal experimentation.

145

## 146 Statistical analysis

147 Age was expressed as mean with standard deviation ( $\pm$ SD). Categorical variables were  
148 expressed as absolute numbers and percentages. Comparisons between subgroups were  
149 carried out using chi-squared tests in SPSS statistics 21. The answers provided via the free  
150 text boxes were analysed manually and summarized to obtain an overview of the  
151 perspectives shared by scientists working in academia.

152

## 153 **Results**

154 The population investigated in this survey included scientists working at universities or  
155 research centres, and employees of companies in any field related to animal  
156 experimentation, alternatives or policy-making within the field of animal research. A total of  
157 457 responses were obtained, of which 367 researchers in an academic setting were  
158 selected. Academic researchers were in our opinion the best choice to select our data on  
159 because they form the biggest and most influential group of people involved in the execution  
160 of animal experimentation.

161 Of the sample as a whole, the mean age was 38 ( $\pm 11$ ) and roughly equal numbers of men  
162 and women responded, 56% and 44% respectively. Regarding the level of education  
163 attained, the distribution of the responders was as follows: 38% PhD and/or MSc, 25%  
164 Principal Investigator, 16% post-doc, 21% other, Table S1. Of all responders, 74% were  
165 directly involved in animal research at the time of the survey. More detailed information on  
166 the general demographics can be found in Table 1, and Tables S1A-S1D in S1 Text.

167 **Table 1. General demographics of survey respondents (N=367)**

| Question                                    | Yes (%) | No (%) | Total N |
|---------------------------------------------|---------|--------|---------|
| Was any education given on animal research? | 84      | 16     | 365     |
| Currently working with animals?             | 74      | 26     | 367     |
| Currently working in the Netherlands?       | 75      | 25     | 361     |

168

169 Achievability and support towards the 2025-goal

170 As the 2025-goal is a recent example of governmental influence on the use of animals and  
171 the stimulation of animal-free innovations, this setting was used to map the attitude of  
172 researchers towards such a goal and, according to their perspective, rank the importance of  
173 the selected roadblocks. Furthermore, the influence of such a goal on migration of  
174 researchers or their research was investigated.

175

176 By studying the preferences and needs of researchers regarding the achievability of the  
177 2025-goal and their support towards this goal, a more successful implementation of animal-  
178 free innovations could be achieved. Among researchers, animal studies and its regulations  
179 are a delicate but lively topic. 85% of the responders expressed themselves by using one or  
180 multiple free text boxes to substantiate their opinion about this topic. Of these responders,  
181 43% made use of every free text box, indicating the close involvement of researchers with  
182 this topic.

183

184 The majority of the researchers (71%) shared the opinion that the implementation of the  
185 2025-goal is not achievable in their field of research. However, 40% of the responders  
186 indicated that they would support such a goal, Fig 2A. Many believed that, at this moment,  
187 knowledge on alternative methods is not sufficient to abandon the use of animals completely.  
188 Nevertheless, researchers expressed that if the government would invest heavily in



189 alternatives for animal models, the goal should be possible eventually. However, they did not  
190 expect significant change on such a short timescale as 2025.

191

192 Because the quite prevalent difference between how researchers responded to the question  
193 towards the achievability of the goal and to the question whether they would support the  
194 2025-goal, we further split up the analysis by comparing several groups. The opinions of  
195 researchers working with animals versus those who do not were compared, Fig 2B and Fig  
196 2C. 78% of the researchers working with animals share the opinion that the 2025-goal is not  
197 achievable, compared to 53% of the researchers who do not work with animals ( $p \leq 0.001$ ).

198 In addition, 36% of the former group would support the 2025-goal, comparing to 54% of the  
199 latter group ( $p \leq 0.01$ ), Fig 2D and Fig 2E. Comparing researchers working in the

200 Netherlands versus those who do not show no statistical differences in both achievability and  
201 supportiveness to the 2025-goal that was used as an example.

202

## 203 **Fig 2. Overview of opinions towards the 2025-goal according to researchers**

204 **participating in the current study:** (A) Response for the questions whether the responders  
205 thought the 2025-goal is achievable and whether they would support it (N=367). (B)

206 Achievability of the 2025-goal divided into researchers working with animals (N=271) and  
207 researchers working without animals (N=96), together with the division of researchers  
208 working inside the Netherlands (N=280) or outside of the Netherlands (N=87). (C)

209 Supportiveness of the 2025-goal divided into researchers working with animals (N=271) and  
210 researchers working without animals (N=96), together with the division of researchers  
211 working inside the Netherlands (N=280) or outside of the Netherlands (N=87).

212

213 Ranking the roadblocks

214 In order to indicate the flaws in communication between governmental instances and  
215 researchers, we gained insight into the most important roadblocks of the implementation of a  
216 goal like the 2025-goal, as seen by researchers. Ten roadblocks were pre-selected based on  
217 previous literature, Table 2. Definitions of the selected roadblocks can be found in S2.

218

219 **Table 2. Ten most frequently listed roadblocks for implementation and development of**  
220 **alternatives.**

|     |                                  |      |                                     |
|-----|----------------------------------|------|-------------------------------------|
| I   | Alternatives are not animal-free | VI   | Pressure to conform                 |
| II  | Awareness is lacking             | VII  | Publishing in high-impact journals  |
| III | Costs of implementation          | VIII | Reliability                         |
| IV  | Differences in regulation        | IX   | Research funding                    |
| V   | Ethical issues                   | X    | Time/effort to develop alternatives |

221

222 In total, 64% of the responders ranked the roadblock 'reliability' as 'very important', Fig 3. To  
223 put that score into perspective, the roadblock with the second highest percentage of the  
224 category 'very important' is 'time/effort to develop alternatives'. This roadblock was ranked as  
225 'very important' by 29% of the responders. When we combine the scores of 'very important'  
226 and 'important', only the aforementioned roadblocks have a majority of responders giving  
227 these scores. Even though differences exist between the ranking of 'reliability' and  
228 'differences in regulations' or 'ethical issues', all roadblocks were ranked as (very) important  
229 to some extent.

230

231 **Fig 3. Overview of roadblocks ranked according to their importance as stated by the**  
232 **researchers:** The importance of the different roadblocks was scored using six categories:  
233 'very important', 'important', 'slightly important', 'not important', 'I don't know', and 'not  
234 applicable'.

235

236 Migration of researchers

237 A potential and rather serious impact of regulations such as the 2025-goal could be that  
238 researchers feel forced to leave institutes, states or countries in order to keep their research  
239 going. To further investigate the possibility of scientists leaving and their opinion on migration  
240 due to regulations, responders working with animals were directed to further in-depth  
241 questions concerning animal research. Responders were asked whether they would consider  
242 moving to another place if their animal research were no longer allowed where they were  
243 currently working. Of the responders, 46% would consider moving themselves or their  
244 research, 23% answered maybe, and 31% would not, Fig 4A. However, the responders who  
245 would not or would maybe consider moving frequently gave as additional motivation that they  
246 would collaborate with research institutes abroad, rather than moving themselves. This  
247 means that (a part) of their research will be moved abroad after all. Overall, more than half of  
248 the responders would consider to move either themselves or their research.  
249

250 To determine a possible relation between the age of responders and their willingness to  
251 migrate when their research were no longer allowed, answers were compared between  
252 different age groups, Fig 4B. Responders with an age between 30 and 39 had the highest  
253 percentage of researchers who would consider to migrate. The highest amount of  
254 responders who were uncertain, were people of age 20 till 29. Responders with an age  
255 between 50 and 59 had the highest percentage of responders who would not consider  
256 moving.

257

258 To determine whether responders who are already working abroad would consider migration  
259 more easily than researchers who are working in their native country, the answers of these  
260 two groups were compared with each other, Fig 4C. Of the researchers working abroad, 67%  
261 would consider moving, compared to 41% of the responders working in their native country.  
262 The percentage of researchers who were uncertain was similar in both groups. A slightly  
263 bigger percentage of researchers working in their native country answered that they would  
264 not consider moving (24%), compared to responders working abroad (20%).

265

266 **Fig 4. Willingness to migrate due to governmental legislation:** (A) General opinion on the  
267 question whether the responders would consider to migrate due to stricter governmental  
268 legislation (N=271). (B) Willingness to migrate divided by age groups of 20-29 (N=58), 30-39  
269 (N=81), 40-49 (N=47), 50-59 (N=47) and 60+ (N=12) years old. (C) Willingness to migrate  
270 comparing researchers working in their native country (N=193) and working abroad (N=49).

271

## 272 **Discussion**

273 In this paper, we elucidated the thoughts and opinions of researchers concerning support  
274 and achievability of governmental goals to stimulate innovations in animal-free research. We  
275 were able to determine the most important roadblocks in the implementation of animal-free

276 methods, as seen by researchers. Finally, the paper demonstrated that researchers are more  
277 willing to migrate as a result of stricter legislation.

278

#### 279 Implementation of governmental goals

280 Whereas approximately half of the responders would support governmental regulations  
281 concerning implementation of animal-free innovations, 71% of the researchers share the  
282 opinion that implementation of the 2025-goal is not yet achievable in their field of science.

283 Implementation of innovations that focus specifically on reducing and/or replacing animal  
284 models is not simple given the complexity of animal research and its purposes [14].

285 Therefore, investment of governmental agencies across the world in the refinement of  
286 necessary animal experiments might result in minimizing stress and discomfort amongst  
287 animals used for experimentation. Furthermore, readily available innovations could be used  
288 more efficiently and researchers should be made (more) aware of them. Besides that, cross-  
289 sectoral and multidisciplinary cooperation could be stimulated in order to improve innovative  
290 developments towards alternative methods for animal research [14]. With this cooperation,  
291 new developments can be shared across scientific or national borders.

292

#### 293 The roadblocks in perspective

294 All the roadblocks for the implementation of animal-free innovations included in the survey  
295 were ranked at least 'slightly important' and the total of responses stating 'important' were  
296 more than the total of 'not important', 'not applicable' or 'I do not know'. This implicates that  
297 all roadblocks could be considered to be at least of some importance. Therefore, a  
298 multidisciplinary approach is advisable as a solution. Given the partial similarities of solutions  
299 to separate roadblocks, we consolidated these solutions in three main pillars: education,  
300 government and data sharing. In Table 3, a full list is presented of all roadblocks and what  
301 pillars may form the solution to tackle these roadblocks, as indicated by a checked (black) or  
302 unchecked (white) box.

303

304 **Table 3. Relation of the roadblocks towards the three pillars. Checked boxes indicate**  
 305 **that the given pillar would suit the needs to tackle the given roadblock.**

| Roadblock                           | Education                           | Government                          | Data sharing                        |
|-------------------------------------|-------------------------------------|-------------------------------------|-------------------------------------|
| Alternatives are not animal-free    | <input type="checkbox"/>            | <input type="checkbox"/>            | <input checked="" type="checkbox"/> |
| Awareness is lacking                | <input checked="" type="checkbox"/> | <input checked="" type="checkbox"/> | <input checked="" type="checkbox"/> |
| Costs of implementation             | <input type="checkbox"/>            | <input type="checkbox"/>            | <input checked="" type="checkbox"/> |
| Differences in regulation           | <input checked="" type="checkbox"/> | <input checked="" type="checkbox"/> | <input checked="" type="checkbox"/> |
| Ethical issues                      | <input checked="" type="checkbox"/> | <input checked="" type="checkbox"/> | <input type="checkbox"/>            |
| Pressure to conform                 | <input checked="" type="checkbox"/> | <input type="checkbox"/>            | <input type="checkbox"/>            |
| Publishing in high-impact journals  | <input type="checkbox"/>            | <input type="checkbox"/>            | <input checked="" type="checkbox"/> |
| Reliability                         | <input checked="" type="checkbox"/> | <input checked="" type="checkbox"/> | <input checked="" type="checkbox"/> |
| Research funding                    | <input type="checkbox"/>            | <input checked="" type="checkbox"/> | <input type="checkbox"/>            |
| Time/effort to develop alternatives | <input checked="" type="checkbox"/> | <input checked="" type="checkbox"/> | <input checked="" type="checkbox"/> |

306

307 The *education*-pillar includes universities, which could provide their students and employees  
 308 with better training and access to knowledge regarding alternatives and their development.  
 309 Institutions could offer courses on the development and implementation of alternative  
 310 methods in order to educate their employees. This makes students and employees more  
 311 aware of the opportunities of animal-free experimentation and may promote the choice to  
 312 consider alternatives in the future.

313

314 The second pillar is the *government*, which can influence the implementation of animal-free  
 315 innovations in multiple ways. First, funding is required since large amounts of money will be  
 316 required in order to stimulate the development and implementation of new animal-free  
 317 innovations. Documentation of the available animal-free methods should also be centralized  
 318 in a reliable open access database in order to increase awareness and usage of the existing  
 319 alternatives. Finally, for a smooth transition of legislations or goals like the 2025-goal, it is  
 320 required that all stakeholders are aware of their responsibilities and expectations of others.

321 Hence, a proper communication between the government and the public has to be  
322 established.

323

324 The pillar on *data sharing* includes accessibility of ‘work-in-progress-data’ that allows  
325 researchers to obtain more insights in what is going on in their field. Researchers tend to not  
326 share research data prior to publication. However, when these data are not shared, other  
327 researchers remain unaware that someone is already working on a certain topic. This might  
328 result in unnecessary duplication of experiments. In addition, publishing negative data is not  
329 incentivized, often being rejected outright from journals or only accepted in low-impact  
330 journals. This makes it of low priority for researchers. This however leads to duplication of  
331 findings since other researchers remain unaware of these negative results and may therefore  
332 perform the same experiments just to conclude the same negative results. Unnecessary  
333 repetition of experiments must thus be prevented and can be solved by an increase in data  
334 sharing. This will result in a lower amount of sacrificed animals and will prevent waste of  
335 valuable time and resources.

336

### 337 Policy driven migration of researchers

338 Van Noorden reviewed the global migration of scientists and the factors that play a role in  
339 this process [12]. As cited from the article, the goal was to “identify underlying trends in  
340 scientists’ movements, investigate what is driving them and explore how they may change”  
341 [12]. The majority of our responders would consider moving to another institute, state or  
342 country when their research were no longer allowed in the country where they were currently  
343 working. Similar to our results, Van Noorden presented that an ‘authoritarian political system  
344 and restricted freedom’ were seen as barriers for emigration to that country by 93% of the  
345 responders [12]. Factors that were seen as incentives by the majority of his responders  
346 included: ‘improved quality of life’ (88%), ‘more research funding’ (84%) and ‘better salary’  
347 (77%) [12]. Governmental influence is, therefore, not the only factor, but it does affect  
348 considerations of researchers regarding migration or collaboration with other institutes.

349

350 A higher percentage of responders willing to migrate was expected to be found in the  
351 younger age groups, considering Van Noorden's results [12], as younger people might be  
352 more flexible and therefore less tied down to a specific location. Additionally, work-related  
353 migration was studied more in depth as people who migrated before might easier migrate a  
354 second time than those who are still working in their native country. Both hypotheses were  
355 supported by our results, indicating that researchers form a mobile community, willing to  
356 migrate or move their research if necessary.

357

358 Researchers did express their concerns about the position of the Netherlands and its  
359 developments in animal-free innovations compared to other countries. These concerns  
360 include that stricter regulations could lead to a drainage of animal research to other  
361 countries, which eventually could harm the research climate in the Netherlands. To prevent  
362 this, researchers that responded to the survey proposed internationalization of a goal like the  
363 2025-goal. When more countries promote the development of alternative models towards  
364 animal research, the risk of negative effects on individual scientific positions could be  
365 reduced [14].

366

367 Despite the relatively large study population, participation bias could be a limitation of the  
368 current study, as the non-respondent rate remains unknown. Although we distributed our  
369 survey both in and outside the Netherlands, almost 75% of the responders were working in  
370 the Netherlands. This might have affected the answers of our responders, as the Dutch  
371 2025-goal was used as an introductory background. A more international public might have  
372 been reached by emphasizing the generality of the 2025-goal to a broader extent. Besides  
373 that, explanation of the individual roadblocks was lacking in the survey. Therefore,  
374 interpretations of the stated roadblocks might have differed amongst participants.  
375 Furthermore, potential important roadblocks might have been excluded from the pre-selected



376 ones. However, as none of the responders mentioned novel roadblocks, it can be concluded  
377 that at least the most important roadblocks were included in the survey.

378

## 379 **Conclusion**

380 The 3R principle is becoming increasingly more prominent in legislation concerning animal  
381 research. As a result, greater stress is placed on the use and development of animal-free  
382 innovations, as is reflected in the 2025-goal of the Dutch government that served as an  
383 example in this paper. However, less was known about the attitude of researchers  
384 concerning animal-free innovations. This paper demonstrated that researchers take  
385 legislation concerning animal research into account, and would consider to migrate when  
386 they could not perform their research due to stricter legislation. Hence, if one aims to make a  
387 systematic impact in animal research, animal regulation should be coordinated at an  
388 international level. If not, research will simply be transferred to less-regulated countries. In  
389 addition, researchers clearly expressed their preference that animal-free research should be  
390 at least as reliable as the rival animal model. Education, governmental influence and data  
391 sharing are tools to optimize the implementation of alternative methods. Ultimately, a  
392 structural solution is only possible if animal-free research becomes more appealing to  
393 researchers, and not by forcing the community.

394

## 395 **Acknowledgements**

396 The authors thank Dr. Amanda Tilot and Dr. Sonja Vernes for excellent supervision  
397 throughout the process, as well as Prof. Dr. Merel Ritskes-Hoitinga, Dr. Matthijs Kox, and  
398 Prof. Thomas Korff, for providing essential insights. In addition, we would like to thank the  
399 Radboud Honours Academy, in particular Noortje ter Berg, for the support we received and  
400 for all opportunities that were given to us while working in this interdisciplinary think tank.  
401 Without their help we would not have had the chance to do this research. Lastly, we want to

402 thank Prof. Han van Krieken for his endorsement and all survey participants and anyone else  
403 who was somehow involved in this project.

404

## 405 **References**

- 406 1. Society NEA-V. Animals in research: overview 2017 [cited 2017]. Available from:  
407 <http://www.neavs.org/research/overview>.
- 408 2. Langley G. The validity of animal experiments in medical research 2009. 161-8 p.
- 409 3. Bos RT. Het Geniale Dier: een andere antropologie: Uitgeverij Boom; 2008. 304 p.
- 410 4. National Research Council Committee on Cost of and Payment for Animal Research.  
411 The National Academies Collection: Reports funded by National Institutes of Health.  
412 Strategies That Influence Cost Containment in Animal Research Facilities. Washington (DC):  
413 National Academies Press (US) National Academy of Sciences; 2000.
- 414 5. Russell WMS, Burch RL. The principles of humane experimental technique London:  
415 Methuen; 1959. Available from: <http://books.google.com/books?id=j75qAAAAMAAJ>.
- 416 6. National Centre for the Replacement Refinement & Reduction of Animals in  
417 Research. The 3R's [cited 2017]. Available from: <https://www.nc3rs.org.uk/the-3rs>.
- 418 7. Pijnappel MC. Lost in technification: Uncovering the latent clash of societal values in  
419 Dutch public policy discourse on animal-testing alternatives [Dissertation]: Radboud  
420 University Nijmegen; 2016.
- 421 8. Directive 2010/63/EU of the European Parliament and of the Council of 22 September  
422 2010 on the protection of animals used for scientific purposes EUR-lex2010.
- 423 9. Devolder T, Reid K, Rogiers V, Webb S, Wilkins D. A review of national public funding  
424 programmes in European countries. *Altex*. 2008;25(3):233-42.
- 425 10. Joobar R, Schmitz N, Annable L, Boksa P. Publication bias: what are the challenges  
426 and can they be overcome? *Journal of psychiatry & neuroscience: JPN*. 2012;37(3):149-52.
- 427 11. Rijksoverheid. Van Dam: In 2025 meeste dierproeven vervangen door innovatief  
428 onderzoek 2016 [cited 2017]. Available from:

- 429 <https://www.rijksoverheid.nl/actueel/nieuws/2016/12/15/van-dam-in-2025-meeste->  
430 [dierproeven-vervangen-door-innovatief-onderzoek.](https://www.rijksoverheid.nl/actueel/nieuws/2016/12/15/van-dam-in-2025-meeste-)
- 431 12. Van Noorden R. Global mobility: Science on the move. *Nature*. 2012;490(7420):326-  
432 9.
- 433 13. Toussaint I. De V van verhalen; persoonlijke verhalen over het vervangen,  
434 verminderen en verfijnen van dierproeven: Nationaal Kenniscentrum Alternatieven voor  
435 dierproeven, Bilthoven; 2013. 189 p.
- 436 14. Advies Denktank Aanvullende Financiering alternatieven voor dierproeven  
437 in opdracht van het Ministerie van Economische Zaken. In transitie! - Nederland  
438 internationaal toonaangevend in proefdiervrije innovaties. 2015.

Responders involved in work related to animal experimentation, policy, or alternative methods (N=457)

N = 457

Excluded: Not working in an academic setting

(N=75)

N = 73

Responders excluding non-academia (N = 382)

Excluded: Students in an academic setting

(N = 17)

Study population: Academic responders, excluding students (N=367)

N = 367

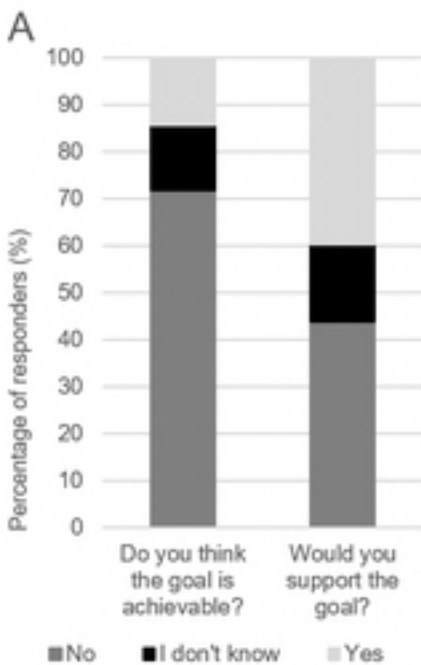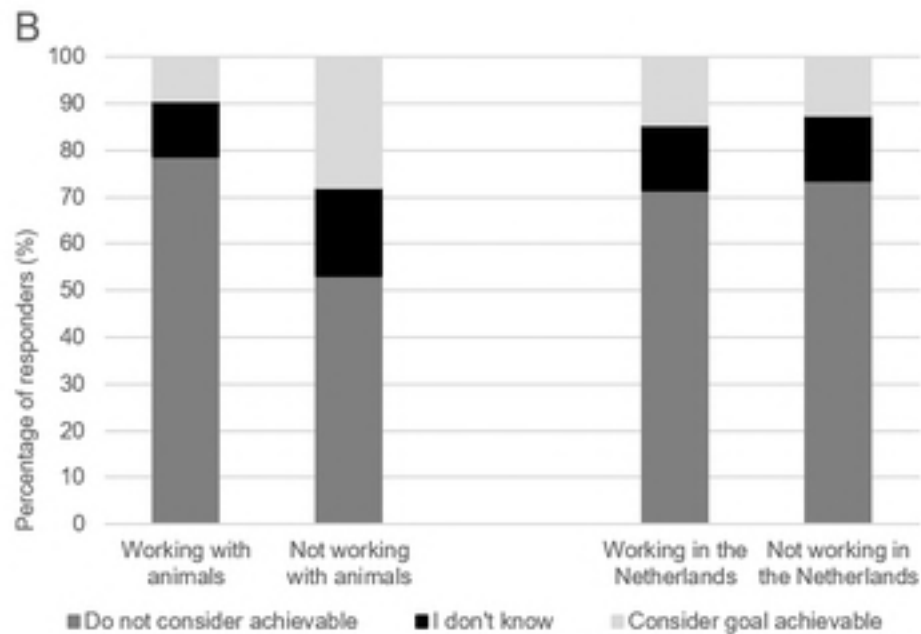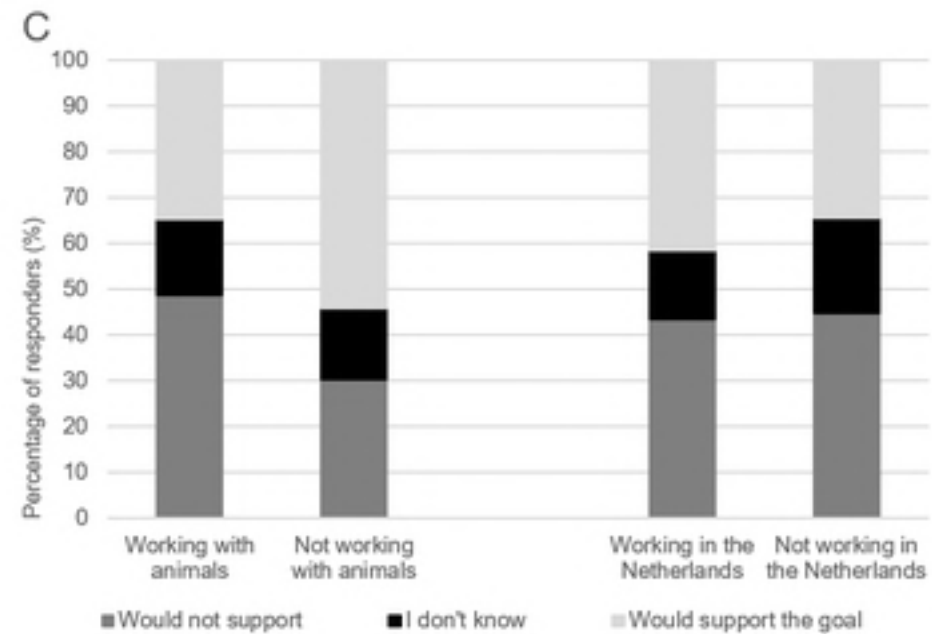

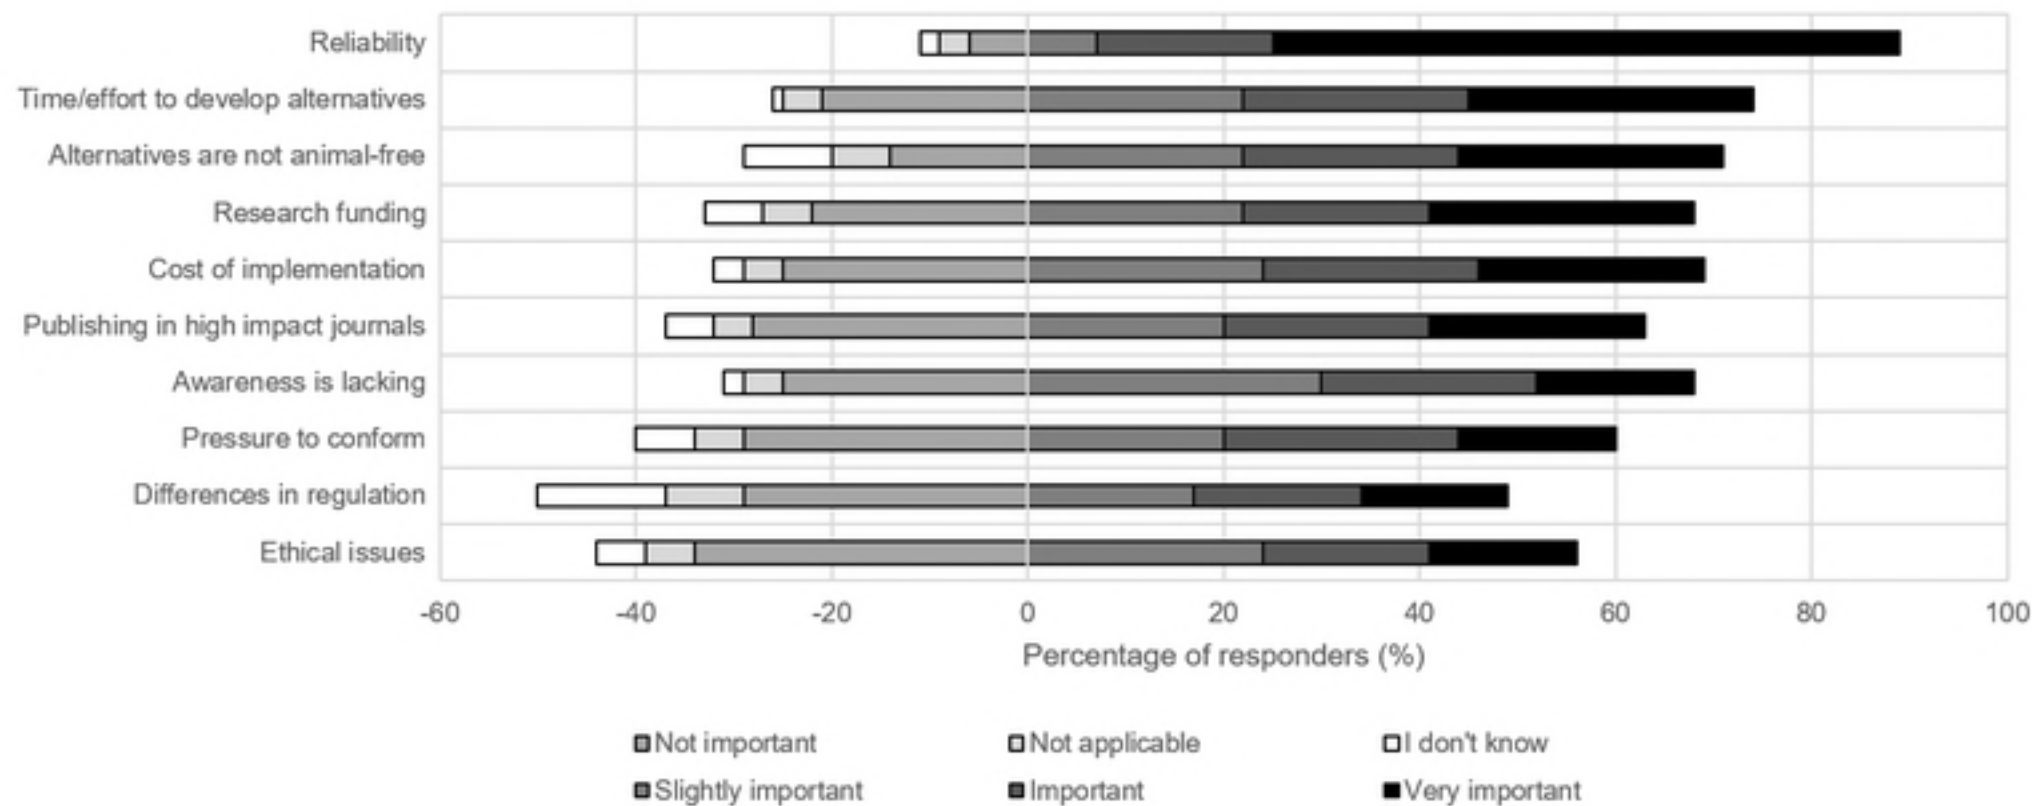

A

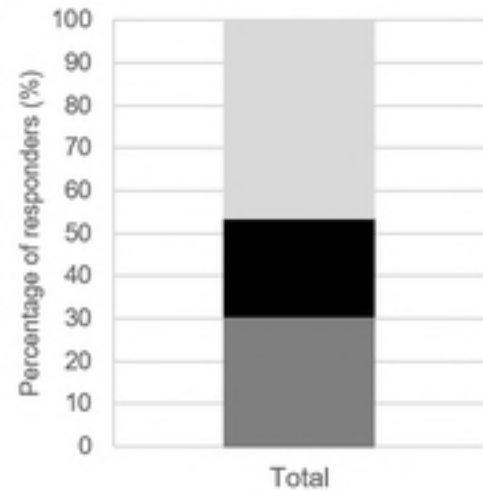

B

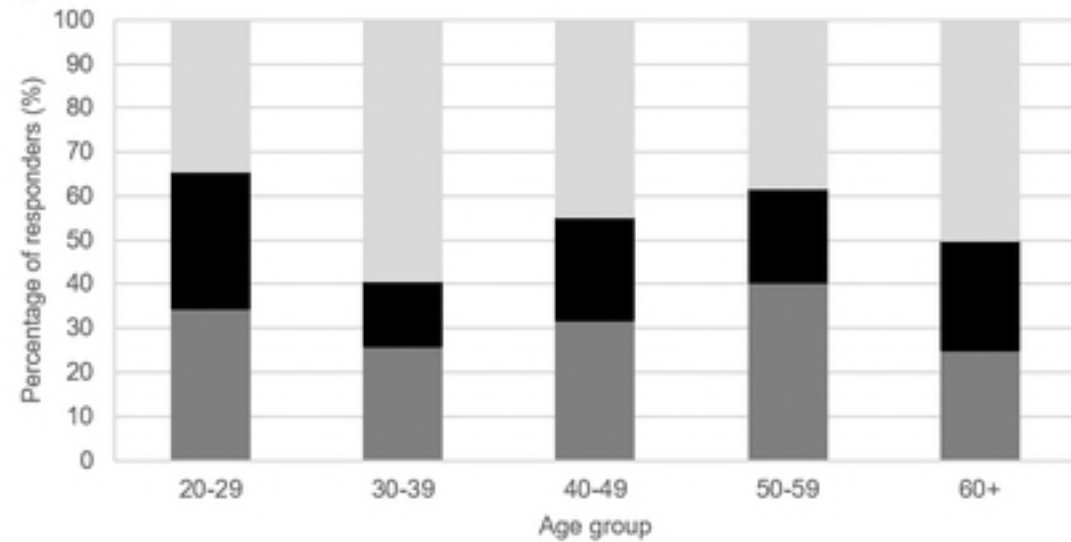

Would consider migrating
  Would maybe consider migrating
  Would not consider migrating

C

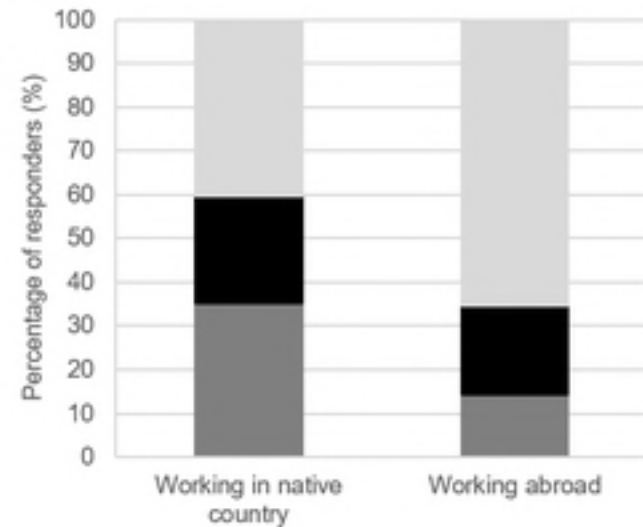

Source: https://www.biorxiv.org/content/10.1101/337063v1.full.pdf
